# Supplementary material
Source: publisher figshare collection journal article supplement (https://acs.figshare.com/ndownloader/files/18270038)
Supplement: Supplementary file 1 [file 18270038]

# Supporting Information

## Interaction between CO and a Coke-Resistant NiIn/SiO<sub>2</sub> Methane Dry Reforming Catalyst: A DRIFTS and CO Pulse Study

Miklós Németh<sup>1</sup>, Ferenc Somodi<sup>1</sup> and Anita Horváth<sup>1\*</sup>

<sup>1</sup>Hungarian Academy of Sciences, Centre for Energy Research, Institute for Energy Security and Environmental Safety, Department of Surface Chemistry and Catalysis, Konkoly-Thege M. street 29-33, H-1121 Budapest, Hungary

\*corresponding author: [horvath.anita@energia.mta.hu](mailto:horvath.anita@energia.mta.hu), (+36)-1-392-2222/31-82

Content: Table S1, Figure S1 and Figure S2.

### Table S1

Suggested main assignments of carbonyl bands observed during DRIFTS studies

| on Ni/SiO <sub>2</sub>                                                                                                     | on NiIn/SiO <sub>2</sub>                                                                                                            |
|----------------------------------------------------------------------------------------------------------------------------|-------------------------------------------------------------------------------------------------------------------------------------|
| 2087 cm <sup>-1</sup><br>linear di- or tricarbonyls on low-coordinated Ni <sup>0</sup> atoms of highly dispersed particles | 2075 cm <sup>-1</sup><br>linear di- or tricarbonyls bonded on low-coordinated Ni <sup>0</sup> atoms with In atoms in close vicinity |
| 2050 cm <sup>-1</sup><br>linearly adsorbed CO on Ni <sup>0</sup> (high surface coverage)/physisorbed Ni(CO) <sub>4</sub>   | 2050 cm <sup>-1</sup><br>linearly adsorbed CO on Ni <sup>0</sup> (high surface coverage)                                            |
| 2040 cm <sup>-1</sup><br>linearly adsorbed CO on Ni <sup>0</sup> (low surface coverage)                                    | 2035 cm <sup>-1</sup><br>linearly adsorbed CO (low surface coverage) on Ni <sup>0</sup> surrounded by less In atoms                 |
|                                                                                                                            | 2020-2010 cm <sup>-1</sup><br>linearly adsorbed CO (high-low surface coverage) on Ni <sup>0</sup> surrounded by many In atoms       |
| 1940 cm <sup>-1</sup> -1820 cm <sup>-1</sup><br>bridge or multiply-bonded CO on Ni on low index planes                     |                                                                                                                                     |

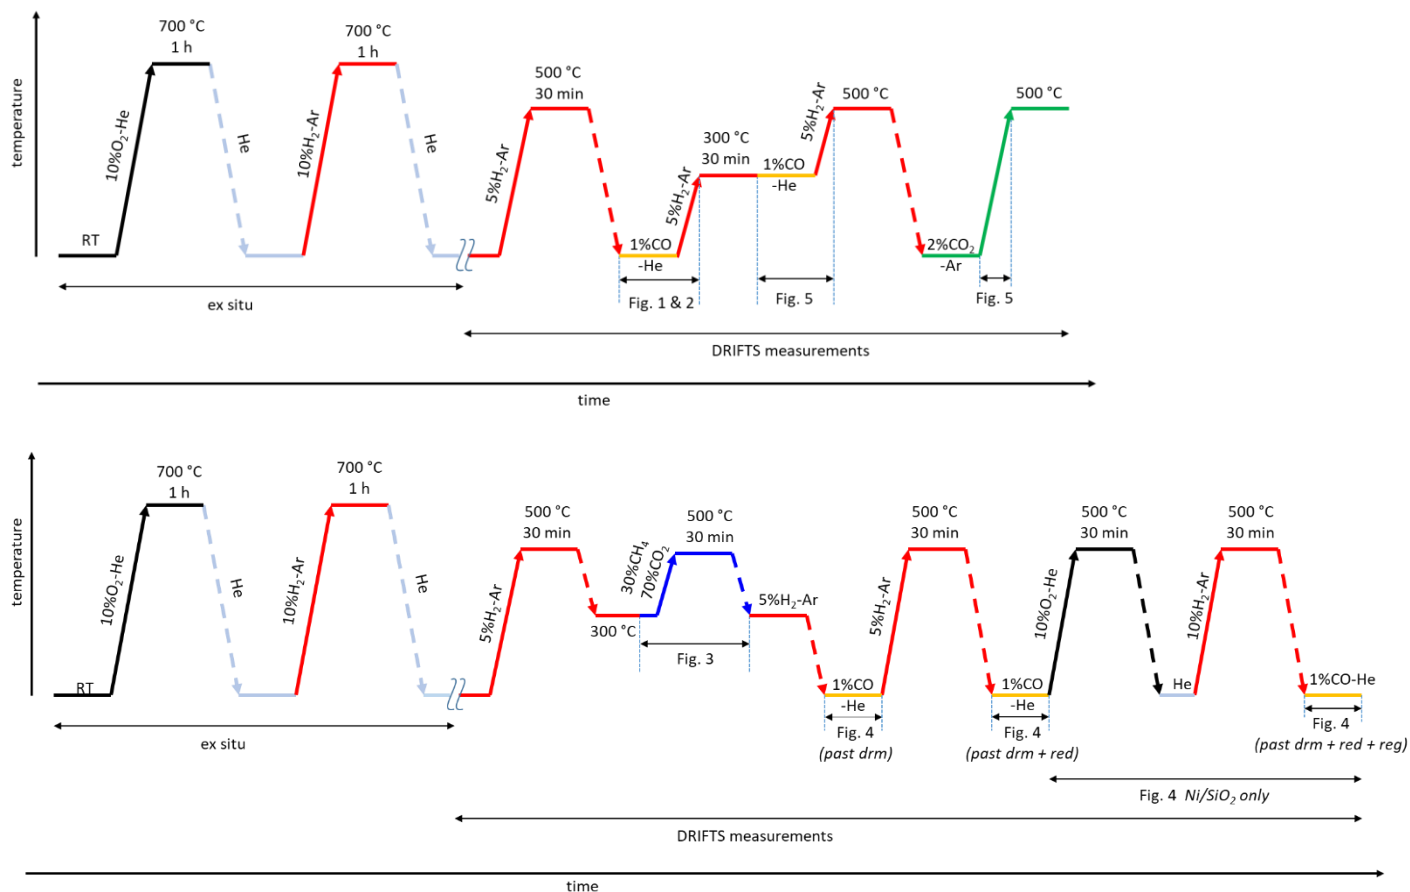

**Figure S1.** Scheme of individual experimental steps of DRIFTS studies

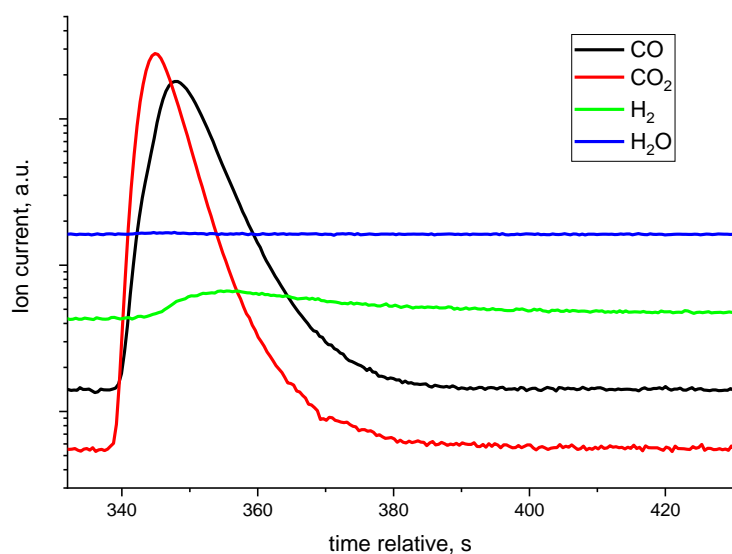

**Figure S2.** First pulse of the CO pulse-flow experiments on the NiIn/SiO<sub>2</sub> catalyst detected by MS.
